# Supplementary material for: Total flavonoids in Epimedium koreanum Nakai alleviated chronic renal failure via promoting AMPK activation
Source: Royal Society of Chemistry journal article supplement (doi:10.1039/d1fo03494d), 2021-12-09

## Supporting information

### **Total flavonoid in *Epimedium koreanum* Nakai alleviated chronic renal failure via promoting AMPK activation**

Yudan Zhao<sup>a</sup>, Ruiqi Zhang<sup>a</sup>, Lintong Mu<sup>a</sup>, Wanyue Yang<sup>a</sup>, Xin Zhang<sup>a</sup>, Ling Han<sup>c</sup>, Chongning Lv<sup>\*a,b</sup>, Jincai Lu<sup>\*a,b</sup>

<sup>a</sup>*School of Traditional Chinese Materia Medica, Shenyang Pharmaceutical University, Shenyang 110016, PR China.*

<sup>b</sup>*Liaoning Provincial Key Laboratory of TCM Resources Conservation and Development, Shenyang Pharmaceutical University, Shenyang 110006, PR China.*

<sup>c</sup>*NERC for the Pharmaceutics of Traditional Chinese Medicines, Benxi 117004, PR China*

### **Corresponding authors**

Tel./Fax: +86 24 43520728

Email addresses: [jincailu@syphu.edu.cn](mailto:jincailu@syphu.edu.cn) (Jincai Lu); [lcnmi@outlook.com](mailto:lcnmi@outlook.com) (Chongning Lv)

# 1. Animals'treatment

2019/7/26 实验动物信息管理系统

## 北京市 实验动物质量合格证

购买单位: 沈阳药科大学 No.1103221911006770  
动物实验单位: 沈阳药科大学

| 动物品种品系                                                                                      | 等级                                                                                                    | 动物规格        |      |                    | 数量  |
|---------------------------------------------------------------------------------------------|-------------------------------------------------------------------------------------------------------|-------------|------|--------------------|-----|
|                                                                                             |                                                                                                       | 体重          | 日龄   | 性别                 |     |
| 大鼠, SD                                                                                      | SPF级                                                                                                  | 160-180g    |      | 雄性                 | 136 |
| 最近一次质量检测日期                                                                                  | 2019-07-09                                                                                            | 质量检测单位      |      | 中国医学科学院医学实验动物研究所   |     |
| 用途                                                                                          | 科学研究                                                                                                  | 实验单位使用许可证编号 |      | SVXK (辽) 2018-0009 |     |
|  出售单位 (盖章) |  北京华阜康生物科技股份<br>有限公司 |             | 许可证号 | SCXK (京) 2019-0008 |     |

质量负责人: 田玉书 经手人: 王果 开单日期: 2019年07月27日

赵昱丹

项目执行人签 (章): 赵昱丹 Yudan Zhao  
2019年7月25日

实验动物伦理委员会审批意见:  
同意

委员签 (章): 田玉书  
2019年7月25日

审查编号: SYPU-IAEC-2019-07-203

2. Fig. 5

$\alpha$ -SMA

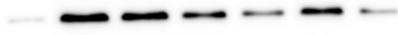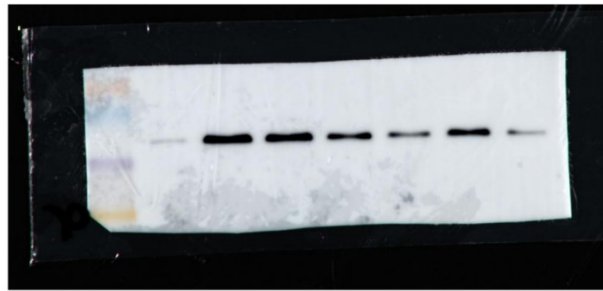

Fibronectin

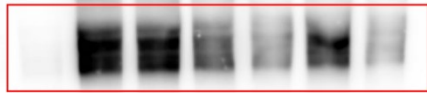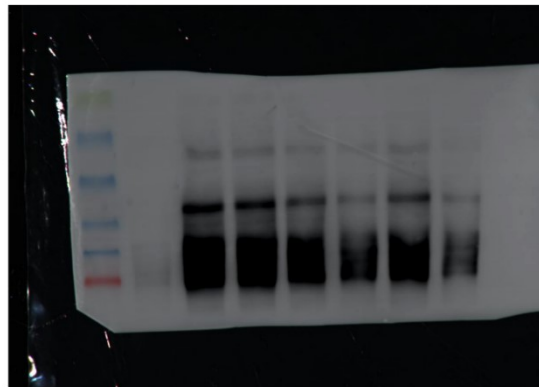

E-cadherin

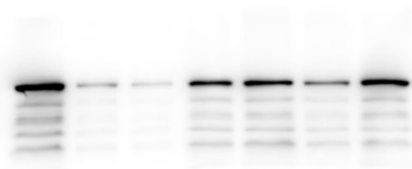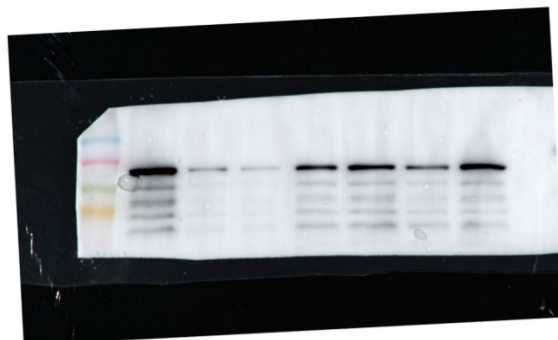

$\beta$ -actin

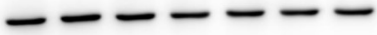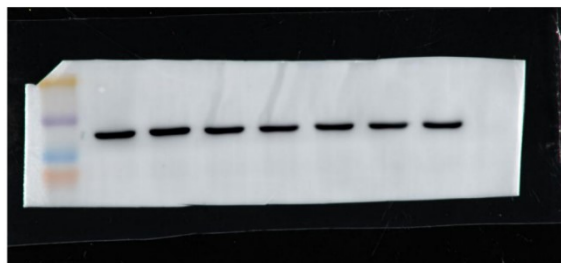

3. Fig. 7

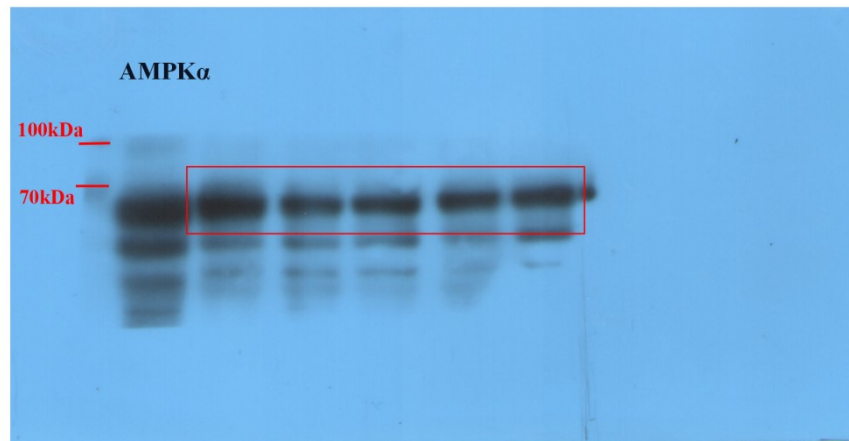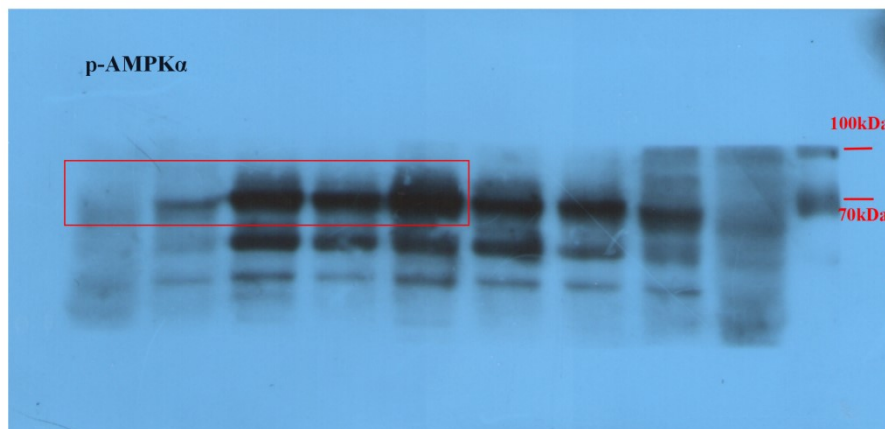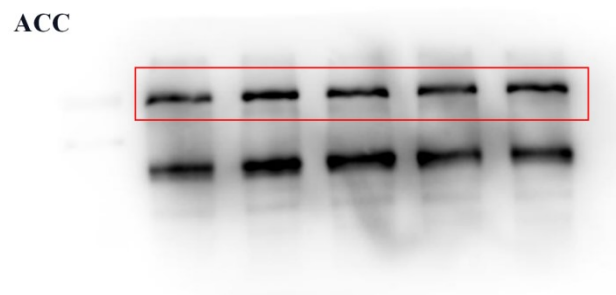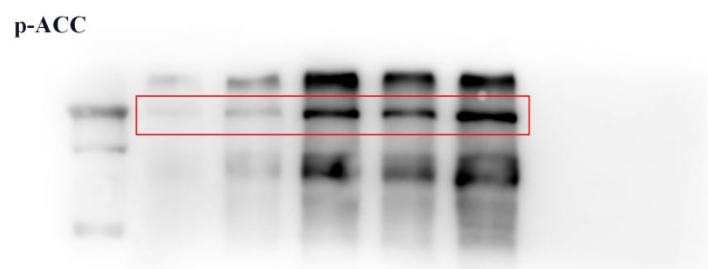

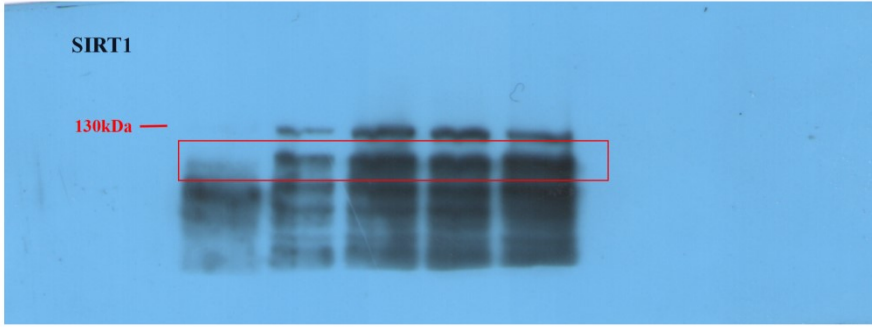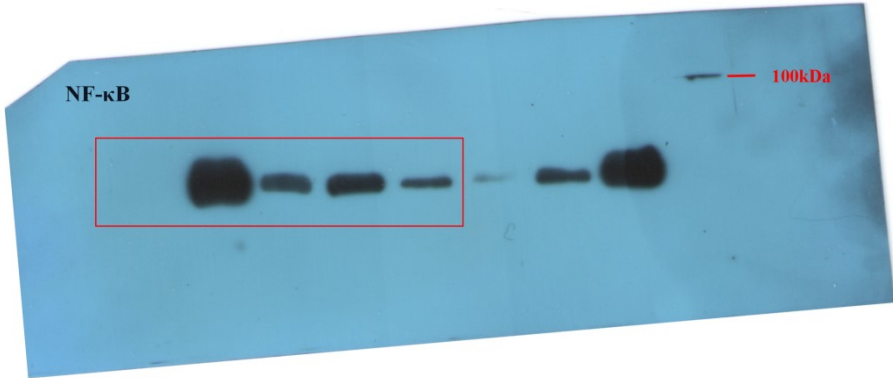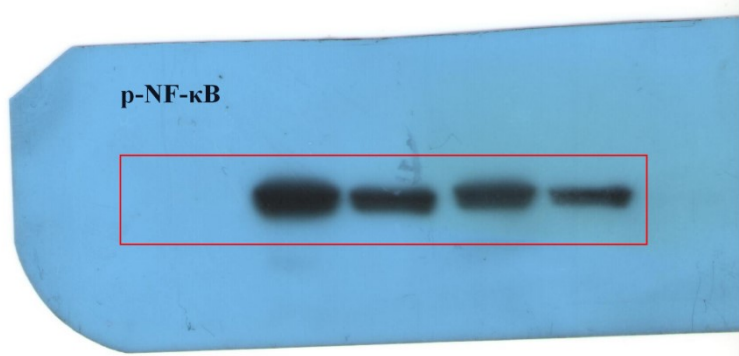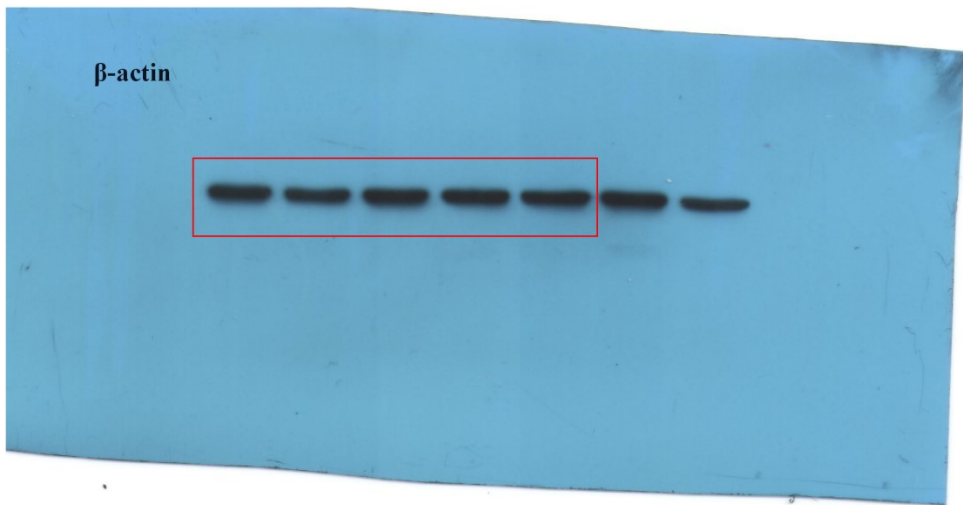

4. Fig. 8

AMPK $\alpha$

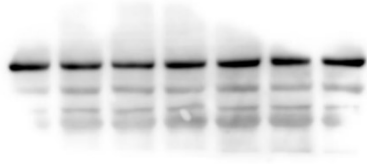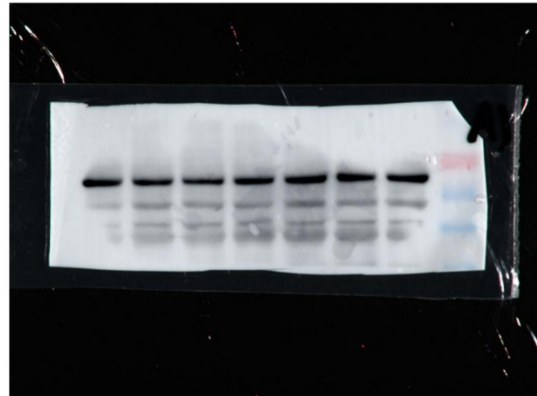

p-AMPK $\alpha$

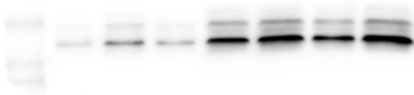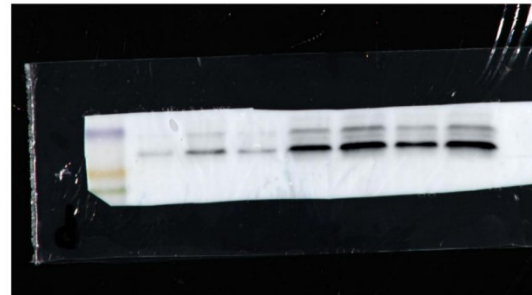

ACC

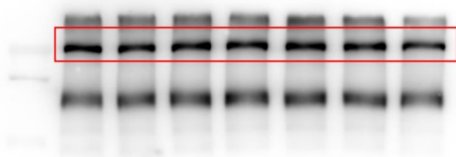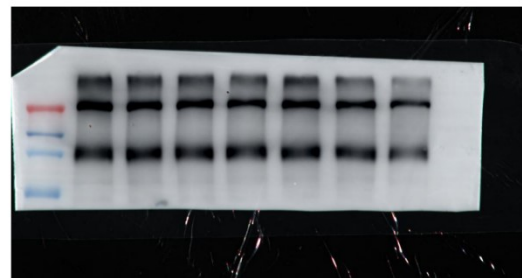

p-ACC

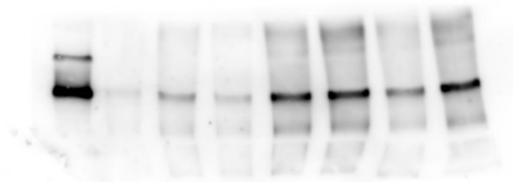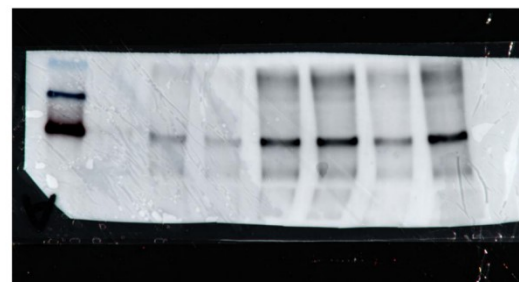

SIRT1

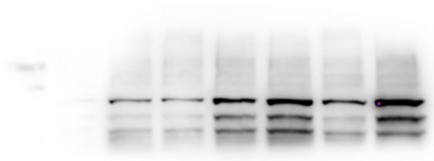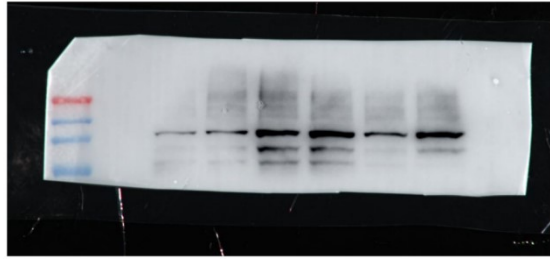

NF- $\kappa$ B

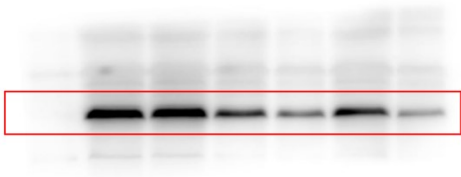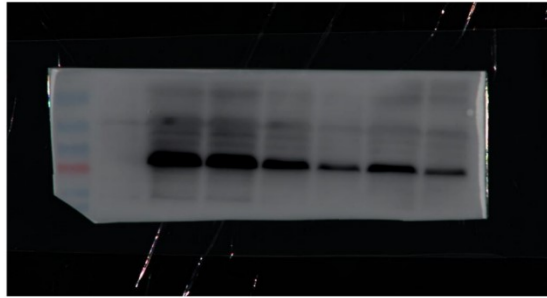

p-NF- $\kappa$ B

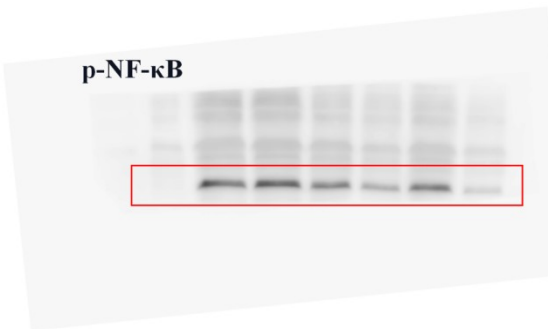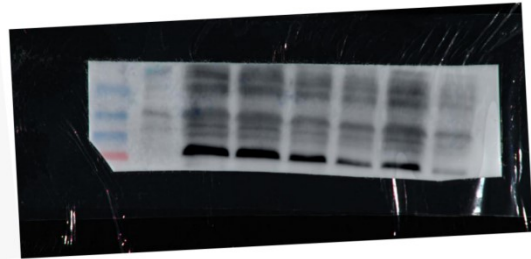

$\beta$ -actin

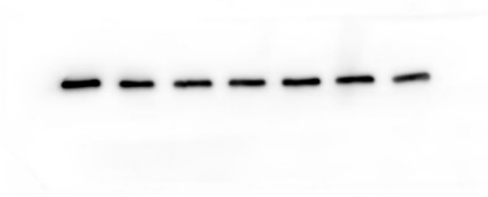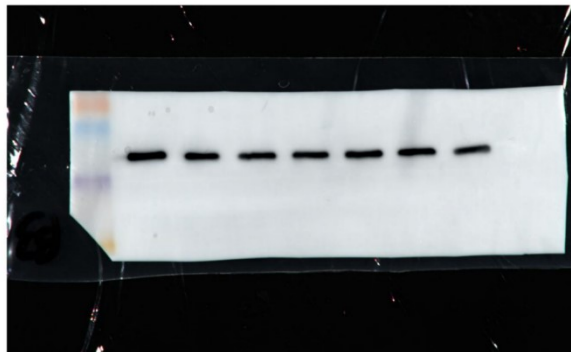

Supplement: d1fo03494d2.pdf [file d1fo03494d2.pdf]
