# Supplementary material for: Total flavonoids in Epimedium koreanum Nakai alleviated chronic renal failure via promoting AMPK activation
Source: Royal Society of Chemistry journal article supplement (doi:10.1039/d1fo03494d), 2021-12-09
Supplement: d1fo03494d1.pdf [file d1fo03494d1.pdf]

## Supplementary Materials

### **Total flavonoid of *Epimedium koreanum* Nakai plays a therapeutic role in chronic renal failure by promoting AMPK activation**

Yudan Zhao<sup>a</sup>, Ruiqi Zhang<sup>a</sup>, Lintong Mu<sup>a</sup>, Wanyue Yang<sup>a</sup>, Xin Zhang<sup>a</sup>, Ling Han<sup>c</sup>, Chongning Lv<sup>\*a,b</sup>, Jincai Lu<sup>\*a,b</sup>

<sup>a</sup>*School of Traditional Chinese Materia Medica, Shenyang Pharmaceutical University, Shenyang 110016, PR China.*

<sup>b</sup>*Liaoning Provincial Key Laboratory of TCM Resources Conservation and Development, Shenyang Pharmaceutical University, Shenyang 110006, PR China.*

<sup>c</sup>*NERC for the Pharmaceutics of Traditional Chinese Medicines, Benxi 117004, PR China*

### **Corresponding authors**

Tel./Fax: +86 24 43520728

Email addresses: [jincailu@syphu.edu.cn](mailto:jincailu@syphu.edu.cn) (Jincai Lu); [lcnmil@outlook.com](mailto:lcnmil@outlook.com) (Chongning Lv)

### **Contents**

**Fig. S1** The <sup>1</sup>H NMR spectra of serum and urine samples of the five groups

**Fig. S2** The permutation tests (200 times) of the OPLS-DA models

**Table S1** Accurate m/z, fragment ions of analytes using UHPLC-Q-TOF/MS from TFE

**Table S2** Hemodynamic parameters of the rat kidneys

**Table S3** The endogenous metabolites identified from serum and urine samples

**Table S4** The cytotoxicity of TFE and PFD

**Table S5** qRT-PCR primer sequence

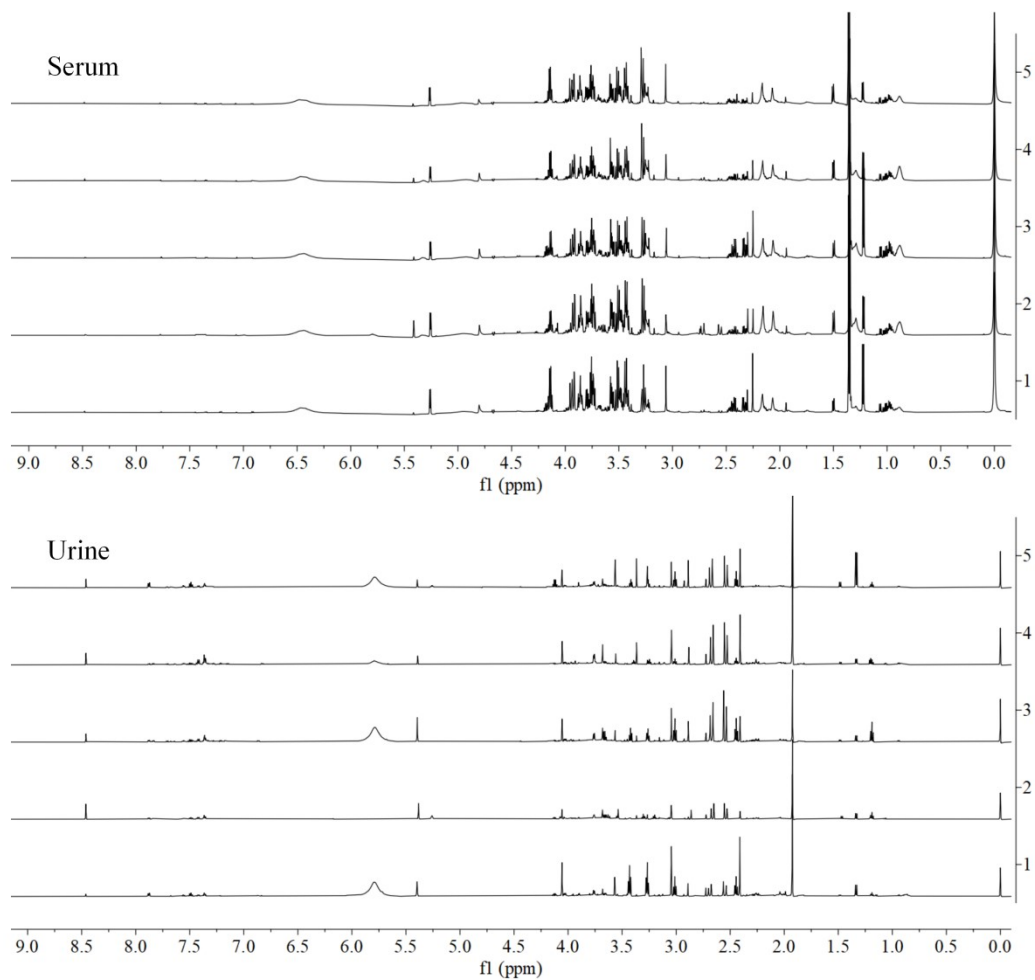

**Fig. S1** The representative <sup>1</sup>H NMR spectra of serum and urine samples for the five groups. 1-Control group, 2-Adenine group, 3-Adenine+TFE (150 mg/kg) group, 4-Adenine+TFE (300 mg/kg) group, 5-Adenine+PFD group.

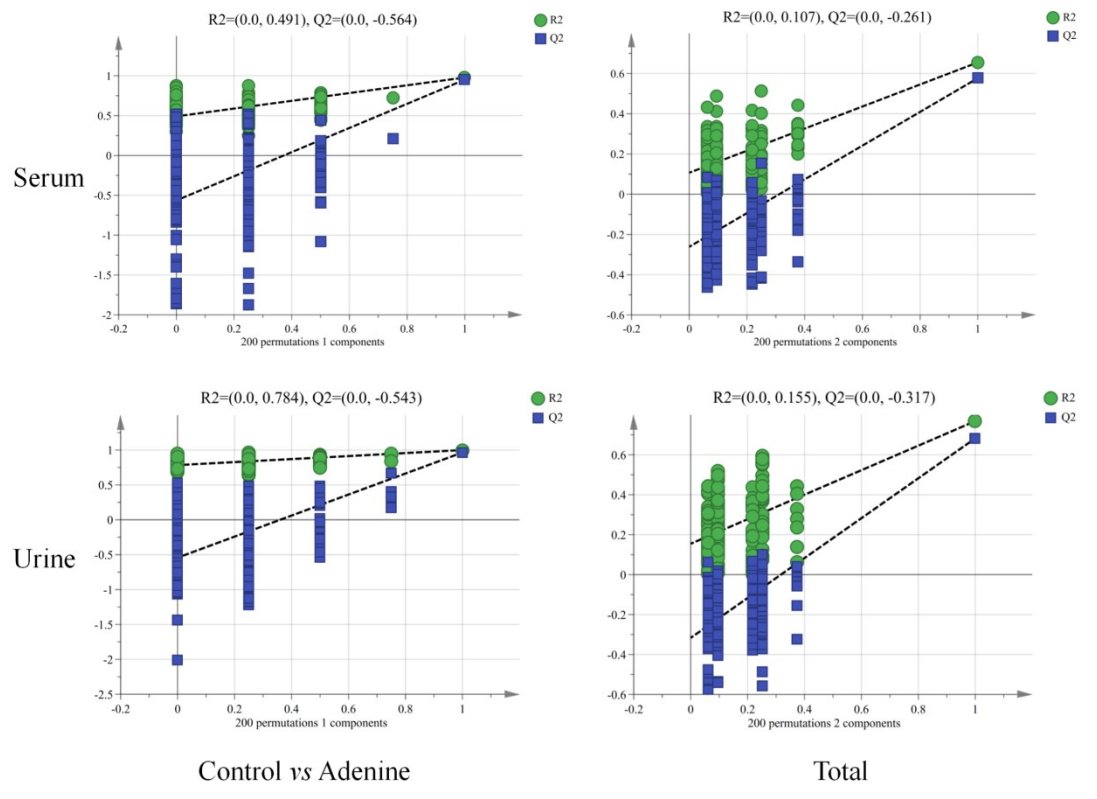

**Fig. S2** The permutation tests (200 times) for the OPLS-DA models. Control vs Adenine means the permutation tests for the OPLS-DA models which established for Control group and adenine group; Total means the permutation tests for the OPLS-DA models which established for the five groups. All Q<sup>2</sup> values are less than zero, indicating that the models fit well.

Table S1 Accurate m/z, fragment ions of analytes using UHPLC-Q-TOF/MS from TFE

| No. | Compound                       | t <sub>R</sub><br>(min) | Molecular<br>formula                            | Quasi<br>molecular<br>ion | m/z<br>Calculated | m/z<br>Experimental | Error<br>(ppm) | Fragment Ions                                                                                                                                                                                         |
|-----|--------------------------------|-------------------------|-------------------------------------------------|---------------------------|-------------------|---------------------|----------------|-------------------------------------------------------------------------------------------------------------------------------------------------------------------------------------------------------|
| 1   | Magnoflorine                   | 4.189                   | C <sub>20</sub> H <sub>24</sub> NO <sub>4</sub> | M <sup>+</sup>            | 342.1700          | 342.1705            | -1.51          | 297.1121 [M+H-(CH <sub>3</sub> ) <sub>2</sub> NH] <sup>+</sup>                                                                                                                                        |
| 2   | Hyperoside                     | 6.087                   | C <sub>21</sub> H <sub>20</sub> O <sub>12</sub> | [M+Na] <sup>+</sup>       | 487.0847          | 487.0848            | -0.22          | 303.0489 [M+H-Gal] <sup>+</sup>                                                                                                                                                                       |
| 3   | Epimedoside E                  | 8.260                   | C <sub>37</sub> H <sub>46</sub> O <sub>19</sub> | [M+H] <sup>+</sup>        | 795.2706          | 795.2712            | -0.75          | 633.1777 [M+H-Glu] <sup>+</sup>                                                                                                                                                                       |
| 4   | Epimedoside A                  | 8.569                   | C <sub>32</sub> H <sub>38</sub> O <sub>15</sub> | [M+H] <sup>+</sup>        | 663.2283          | 663.2285            | -0.23          | 517.1701 [M+H-Rha] <sup>+</sup>                                                                                                                                                                       |
| 5   | Ikarisoside<br>A/Baohuoside II | 10.422                  | C <sub>26</sub> H <sub>28</sub> O <sub>10</sub> | [M+H] <sup>+</sup>        | 501.1755          | 501.1737            | 3.65           | —                                                                                                                                                                                                     |
| 6   | Epimedin A                     | 12.309                  | C <sub>39</sub> H <sub>50</sub> O <sub>20</sub> | [M+H] <sup>+</sup>        | 839.2968          | 839.2977            | -1.05          | 677.2441 [M+H-Glu] <sup>+</sup><br>531.1863 [M+H-Glu-Rha] <sup>+</sup><br>369.13336 [M+H-2Glu-Rha] <sup>+</sup><br>313.0705 [M+H-2Glu-Rha-isobutenyl] <sup>+</sup><br>677.2451 [M+H-Xyl] <sup>+</sup> |
| 7   | Epimedin B                     | 12.827                  | C <sub>38</sub> H <sub>48</sub> O <sub>19</sub> | [M+H] <sup>+</sup>        | 809.2863          | 809.2883            | -2.53          | 531.1869 [M+H-Xyl-Rha] <sup>+</sup><br>369.1339 [M+H-Xyl-Rha-Glu] <sup>+</sup><br>313.0711 [M+H-Xyl-Rha-Glu-isobutenyl] <sup>+</sup><br>677.2437 [M+H-Rha] <sup>+</sup>                               |
| 8   | Epimedin C                     | 13.390                  | C <sub>39</sub> H <sub>50</sub> O <sub>19</sub> | [M+H] <sup>+</sup>        | 823.3019          | 823.3026            | -0.84          | 531.1859 [M+H-2Rha] <sup>+</sup><br>369.1332 [M+H-2Rha-Glu] <sup>+</sup><br>313.0705 [M+H-2Rha-Glu-isobutenyl] <sup>+</sup>                                                                           |

|    |                                 |        |                                                 |                    |          |          |       |                                                                                                                                                                                        |
|----|---------------------------------|--------|-------------------------------------------------|--------------------|----------|----------|-------|----------------------------------------------------------------------------------------------------------------------------------------------------------------------------------------|
| 9  | Icariin                         | 13.809 | C <sub>33</sub> H <sub>40</sub> O <sub>15</sub> | [M+H] <sup>+</sup> | 677.2440 | 677.2471 | -4.59 | 531.1870 [M+H-Rha] <sup>+</sup><br>369.1341 [M+H-Rha-Glu] <sup>+</sup><br>313.0713 [M+H-Rha-Glu-isobutenyl] <sup>+</sup><br>719.2545 [M+H-Glu] <sup>+</sup>                            |
| 10 | Korepimodoside C                | 15.916 | C <sub>41</sub> H <sub>52</sub> O <sub>21</sub> | [M+H] <sup>+</sup> | 881.3074 | 881.3089 | -1.72 | 531.1860 [M+H-Glu-Rha-OAc] <sup>+</sup><br>369.1336 [M+H-2Glu-Rha-OAc] <sup>+</sup><br>313.0706 [M+H-2Glu-Rha-OAc-isobutenyl] <sup>+</sup><br>531.1863 [M+H-Glu-Rha-2OAc] <sup>+</sup> |
| 11 | Epimedokoreanoside I            | 17.858 | C <sub>43</sub> H <sub>54</sub> O <sub>22</sub> | [M+H] <sup>+</sup> | 923.3179 | 923.3205 | -2.76 | 369.1337 [M+H-2Glu-Rha-2OAc] <sup>+</sup><br>313.0709 [M+H-2Glu-Rha-2OAc-isobutenyl] <sup>+</sup><br>531.1852 [M+H-Glu-Rha-3OAc] <sup>+</sup>                                          |
| 12 | Korepimodoside B                | 21.752 | C <sub>45</sub> H <sub>56</sub> O <sub>23</sub> | [M+H] <sup>+</sup> | 965.3285 | 965.3296 | -1.13 | 369.1331 [M+H-2Glu-Rha-3OAc] <sup>+</sup><br>313.0705 [M+H-2Glu-Rha-3OAc-isobutenyl] <sup>+</sup><br>531.1854 [M+H-Glu-Rha-3OAc] <sup>+</sup>                                          |
| 13 | Caohuoside A/B                  | 21.851 | C <sub>45</sub> H <sub>56</sub> O <sub>23</sub> | [M+H] <sup>+</sup> | 965.3285 | 965.3297 | -1.23 | 369.1331 [M+H-2Glu-Rha-3OAc] <sup>+</sup><br>313.0703 [M+H-2Glu-Rha-3OAc-isobutenyl] <sup>+</sup><br>531.1855 [M+H-Glu-Rha-3OAc] <sup>+</sup>                                          |
| 14 | Caohuoside A/B                  | 21.995 | C <sub>45</sub> H <sub>56</sub> O <sub>23</sub> | [M+H] <sup>+</sup> | 965.3285 | 965.3299 | -1.44 | 369.1332 [M+H-2Glu-Rha-3OAc] <sup>+</sup><br>313.0704 [M+H-2Glu-Rha-3OAc-isobutenyl] <sup>+</sup><br>369.1337 [M+H-Glu-Rha] <sup>+</sup>                                               |
| 15 | Sagittatoside A                 | 22.900 | C <sub>33</sub> H <sub>40</sub> O <sub>15</sub> | [M+H] <sup>+</sup> | 677.2440 | 677.2446 | -0.89 | 313.0706 [M+H-Glu-Rha-isobutenyl] <sup>+</sup><br>515.1907 [M+H-Xyl] <sup>+</sup>                                                                                                      |
| 16 | Sagittatoside B                 | 23.308 | C <sub>32</sub> H <sub>38</sub> O <sub>14</sub> | [M+H] <sup>+</sup> | 647.2334 | 647.2339 | -0.72 | 369.1335 [M+H-Xyl-Glu] <sup>+</sup><br>313.0705 [M+H-Xyl-Glu-isobutenyl] <sup>+</sup>                                                                                                  |
| 17 | 2''-O-rhamnosyl<br>icariside II | 23.407 | C <sub>33</sub> H <sub>40</sub> O <sub>14</sub> | [M+H] <sup>+</sup> | 661.2491 | 661.2491 | -0.03 | 369.1331 [M+H-2Rha] <sup>+</sup>                                                                                                                                                       |
| 18 | Baohuoside I                    | 23.981 | C <sub>27</sub> H <sub>30</sub> O <sub>10</sub> | [M+H] <sup>+</sup> | 515.1912 | 515.1913 | -0.25 | 369.1336 [M+H-Rha] <sup>+</sup>                                                                                                                                                        |

Table S2 Hemodynamic parameters of the rat kidneys

| Group                   | PSV (cm/s)                  | EDV (cm/s)                 | RI                       |
|-------------------------|-----------------------------|----------------------------|--------------------------|
| Control                 | 24.01 ± 1.55                | 11.57 ± 1.27               | 0.52 ± 0.06              |
| Adenine                 | 13.73 ± 1.36 <sup>###</sup> | 3.92 ± 0.76 <sup>###</sup> | 0.72 ± 0.03 <sup>#</sup> |
| Adenine+TFE (150 mg/kg) | 17.31 ± 1.51 <sup>*</sup>   | 6.51 ± 0.66 <sup>*</sup>   | 0.62 ± 0.04              |
| Adenine+TFE (300 mg/kg) | 17.33 ± 0.94 <sup>*</sup>   | 7.27 ± 1.18 <sup>*</sup>   | 0.64 ± 0.07              |
| Adenine+PFD             | 18.06 ± 2.51 <sup>**</sup>  | 7.3 ± 1.2 <sup>**</sup>    | 0.60 ± 0.05 <sup>*</sup> |

Data were expressed as mean ± SD. <sup>###</sup>*p* < 0.001, <sup>#</sup>*p* < 0.05, vs control group; <sup>\*\*</sup>*p* < 0.01, <sup>\*</sup>*p* < 0.05, vs adenine group.

Table S3 The endogenous metabolites identified from serum and urine samples

| No. | Chemical shift                          | Metabolites                   | Source      |
|-----|-----------------------------------------|-------------------------------|-------------|
| 1   | 0.86(m),1.28(m)                         | VLDL/LDL                      | serum       |
| 2   | 0.87(m)                                 | Lipids                        | urine       |
| 3   | 0.89(t),1.64(m),1.72(m),3.99(dd)        | 2-hydroxybutyrate             | urine       |
| 4   | 0.90(t),1.1(d)                          | 3-methyl-2-oxovalerate        | urine       |
| 5   | 0.93(t),1.01(d),1.28(m),1.96(m),3.66(m) | L-Isoleucine                  | serum       |
| 6   | 0.94(t),1.72(m),3.72(t)                 | L-Leucine                     | serum,urine |
| 7   | 0.99(d),1.04(d),2.29(m)                 | L-Valine                      | serum       |
| 8   | 1.19(t)                                 | Ethanol                       | urine       |
| 9   | 1.20(d),2.32(d),2.41(d),4.16(m)         | 3-hydroxybutyrate             | serum,urine |
| 10  | 1.33(d),4.11(q)                         | Lactate                       | serum,urine |
| 11  | 1.36(s)                                 | $\alpha$ -hydroxyisobutyrate  | urine       |
| 12  | 1.46(m),1.73(m),1.90(m),3.76(m)         | L-Lysine                      | serum       |
| 13  | 1.48(d),3.78(q)                         | Alanine                       | serum,urine |
| 14  | 1.92(d)                                 | Acetate                       | serum,urine |
| 15  | 2.04(m)                                 | <i>N</i> -acetylglycoproteins | serum       |
| 16  | 2.05(s),2.53(s),2.69(dd),4.41(m)        | <i>N</i> -acetyl-L-aspartate  | serum       |
| 17  | 2.14(s)                                 | <i>O</i> -acetylglycoproteins | serum       |
| 18  | 2.10(m),3.74(m)                         | Glutamate                     | serum       |
| 19  | 2.15(m),2.45(m),3.77(m)                 | Glutamine                     | serum       |
| 20  | 2.23(s)                                 | Acetone                       | serum       |
| 21  | 2.28(s),3.45(s)                         | Acetoacetate                  | serum,urine |
| 22  | 2.35(s)                                 | Oxalacetate                   | urine       |
| 23  | 2.37(s)                                 | Pyruvate                      | serum       |
| 24  | 2.41(s)                                 | Succinate                     | serum,urine |
| 25  | 2.45(t),3.01(t)                         | 2-oxoglutarate                | urine       |
| 26  | 2.54(d),2.68(d)                         | Citrate                       | serum       |
| 27  | 2.72(m),5.3(m)                          | Unsaturated fatty acid        | serum       |
| 28  | 2.83(s)                                 | Methylguanidine               | urine       |

|    |                                         |                      |             |
|----|-----------------------------------------|----------------------|-------------|
| 29 | 2.89(s)                                 | Trimethylamine       | urine       |
| 30 | 3.04(s),3.93(s)                         | Creatine             | serum,urine |
| 31 | 3.05(s),4.05(s)                         | Creatinine           | serum,urine |
| 32 | 3.12(d),3.80(d)                         | Ethanolamine         | urine       |
| 33 | 3.13(s)                                 | Malonate             | urine       |
| 34 | 3.20(s)                                 | Choline              | urine       |
| 35 | 3.25(s)                                 | Betaine              | urine       |
| 36 | 3.26(s)                                 | TMO                  | serum,urine |
| 37 | 3.27(t),3.42(t)                         | Taurine              | urine       |
| 38 | 3.37(s)                                 | Scyllo-inositol      | urine       |
| 39 | 3.56(s)                                 | Glycine              | serum,urine |
| 40 | 3.68(s),3.76(m),7.37(m)                 | Phenylacetyl glycine | urine       |
| 41 | 3.72(s)                                 | trans-aconitate      | urine       |
| 42 | 3.90(d),6.84(d),7.70(d)                 | 4-aminohippurate     | urine       |
| 43 | 3.95(d),7.55(m),7.83(dd)                | Hippurate            | urine       |
| 44 | 4.42(d), 5.25(d)                        | Glucose              | serum       |
| 45 | 4.44(s),8.08(m),8.84(m),9.12(s)         | Trigonelline         | urine       |
| 46 | 5.26(t)                                 | Allantoate           | serum,urine |
| 47 | 5.40(s)                                 | Allantoin            | serum,urine |
| 48 | 5.79(brs)                               | Urea                 | serum,urine |
| 49 | 6.42(brs)                               | Maltol               | serum       |
| 50 | 7.21(m),7.28(m),7.35(s),7.51(m),7.71(d) | Indoxylsulfate       | urine       |
| 51 | 7.49(t),7.55(t),7.87(d)                 | Benzoate             | urine       |
| 52 | 7.68(s)                                 | Guanine              | urine       |
| 53 | 7.89(s)                                 | Xanthine             | urine       |
| 54 | 8.19(m)                                 | Hypoxanthine         | urine       |
| 55 | 8.46(s)                                 | Formate              | serum,urine |

---



Table S4 The The cytotoxicity of TFE and PFD

| Group | IC <sub>20</sub> (μg/mL) |
|-------|--------------------------|
| TFE   | 25.8 ± 1.9               |
| PFD   | 508 ± 6.7                |

Table S5 qRT-PCR primer sequence

| Gene               | Primer (5'-3')                  | Size (bp) |
|--------------------|---------------------------------|-----------|
| $\alpha$ -SMA      | Forward: ACCATCGGGAATGAACGCTT   | 191       |
|                    | Reverse: CTGTCAGCAATGCCTGGGTA   |           |
| E-cadherin         | Forward: ATGAGGTCGGTGCCCGTATT   | 138       |
|                    | Reverse: CGTTGGTCTTGGGGTCTGTGA  |           |
| Fibronectin        | Forward: AAACCTCTACGGGTCGCTG    | 160       |
|                    | Reverse: GCGCTGGTGGTGAAGTCAAA   |           |
| SIRT1              | Forward: AGATTTCAAGGCTGTTGGTTCC | 326       |
|                    | Reverse: CAGCATCATCTTCCAAGCCATT |           |
| NF- $\kappa$ B p65 | Forward: CAGATACCACTAAGACGCACCC | 227       |
|                    | Reverse: CTCCAGGTCTCGCTTCTTCACA |           |
| $\beta$ -actin     | Forward: TGCTATGTTGCCCTAGACTTCG | 240       |
|                    | Reverse: GTTGGCATAGAGGTCTTTACGG |           |
